# Supplementary material for: Variable contribution of wastewater treatment plant effluents to nitrous oxide emission
Source: Copernicus journal article supplement (doi:10.5194/egusphere-2024-638), 2024-03-12
Supplement: Supplementary file 1 [file egusphere-2024-638-supplement.pdf]

Supplementary Material

1  
2  
3  
4  
5  
6  
7  
8  
9  
10  
11

**Variable contribution of wastewater treatment plant effluents to N<sub>2</sub>O emission**

Weiyi Tang<sup>1,\*</sup>, Jeff Talbott<sup>2</sup>, Timothy Jones<sup>2</sup>, Bess B. Ward<sup>1</sup>

Affiliations:

1. Department of Geosciences, Princeton University, Princeton, NJ 08544, USA

2. Department of Environmental Quality, Woodbridge, VA 22193, USA

\*Correspondence to: [weiyit@princeton.edu](mailto:weiyit@princeton.edu)

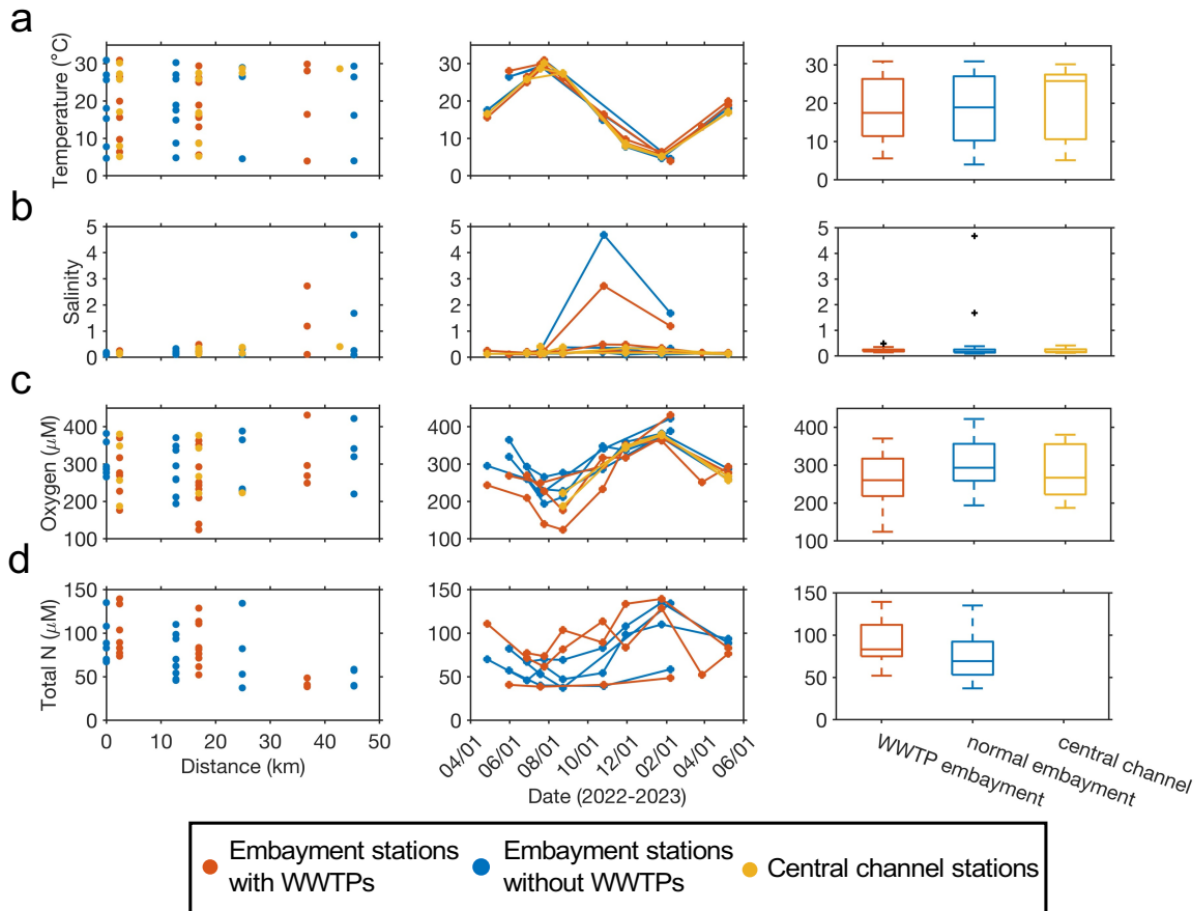

12

13 Supplementary Figure 1. Spatial and temporal variations of temperature (a), salinity (b), oxygen  
 14 (c) and total nitrogen concentration (d). The distance shows from upstream to downstream stations  
 15 in the Potomac River. Embayment stations associated with wastewater treatment plants (WWTPs,  
 16 red circles and lines) and without WWTPs (blue circles and lines), and central channel stations  
 17 (yellow circles and lines). Total N concentration was not measured at central channel stations. For  
 18 the boxplots, the red line in each box is the median. The bottom and top of each box are the 25th  
 19 and 75th percentiles of the observations, respectively. The error bars represent 1.5 times the  
 20 interquartile range away from the bottom or top of the box, with red + signs showing outliers  
 21 beyond that range.

22

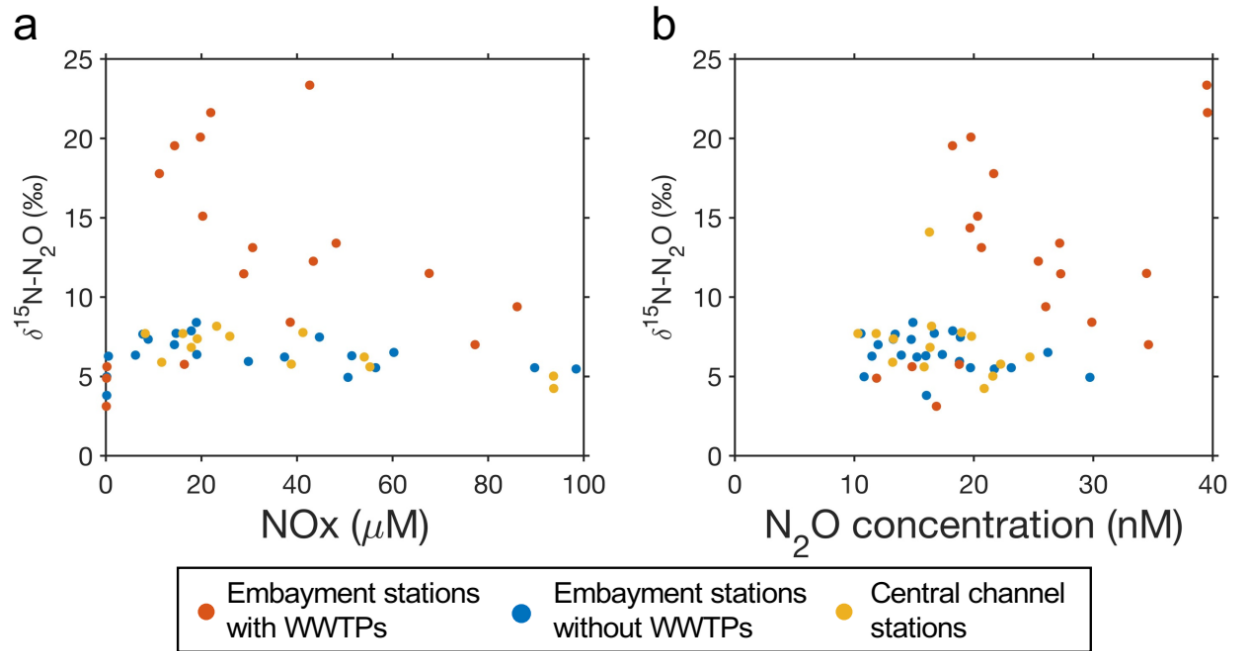

23

24 Supplementary Figure 2. The relationship between  $\delta^{15}\text{N}$  of N<sub>2</sub>O and NO<sub>x</sub> concentration (a) and

25 N<sub>2</sub>O concentration (b).

26

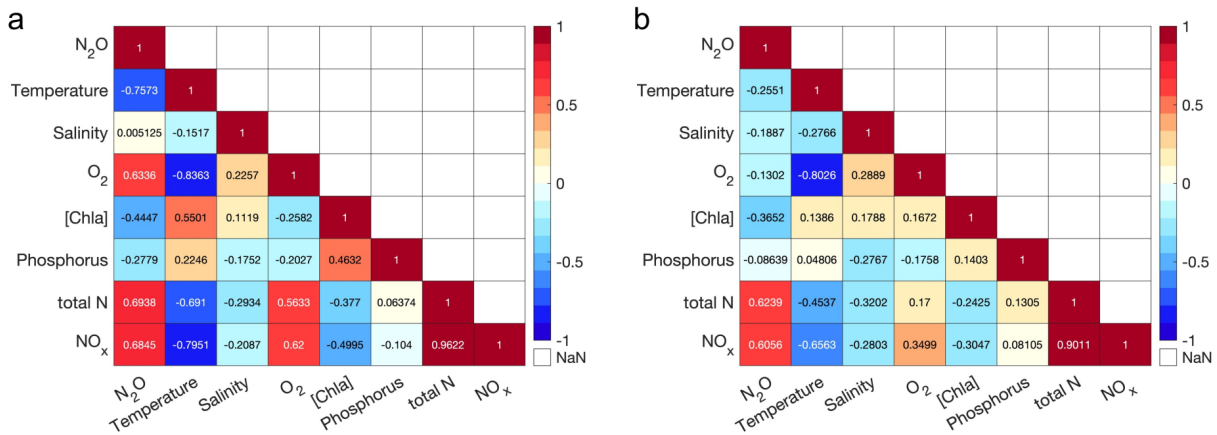

27

28 Supplementary Figure 3. Correlation coefficients among different environmental factors and N<sub>2</sub>O

29 concentration for stations without (a) or with (b) the influence by WWTPs.

30

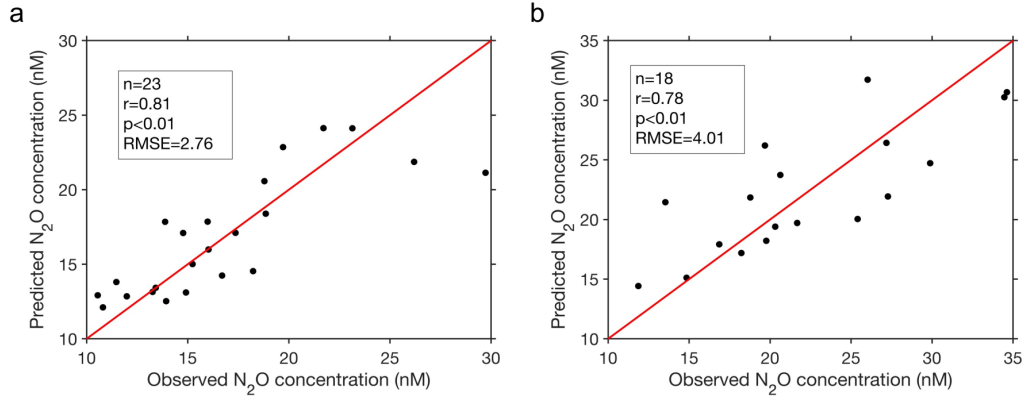

31  
 32 Supplementary Figure 4. Predicted versus observed N<sub>2</sub>O concentration based on a multiple linear  
 33 regression model for stations without (a) or with (b) the influence by WWTPs. The number of data  
 34 points (n), correlation coefficient (r), p value and root mean square error (RMSE) are presented in  
 35 the legend.  
 36

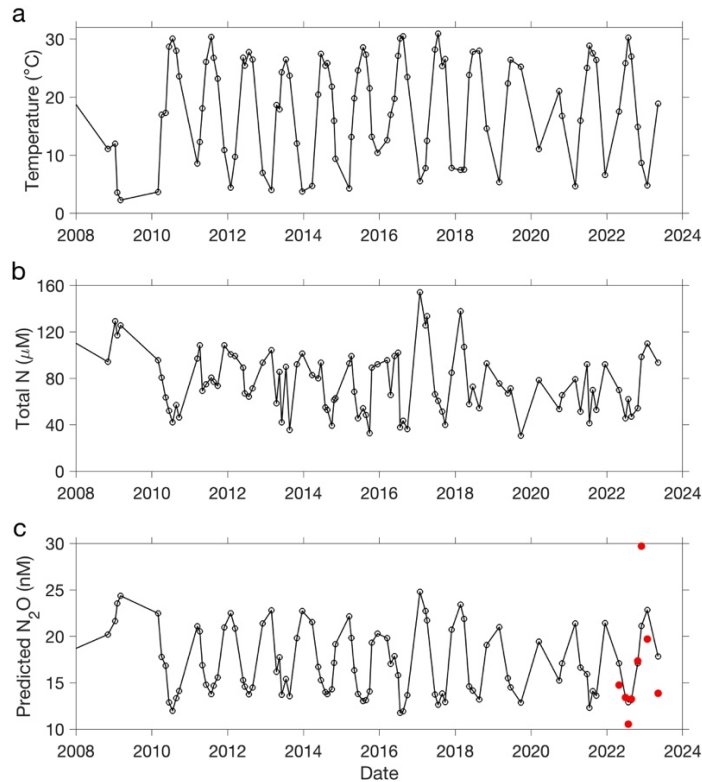

37  
 38 Supplementary Figure 5. Historical measurements of temperature (a) and N concentration (b) at  
 39 the Occoquan Bay sampling station. N<sub>2</sub>O concentration (c) is predicted based on a multiple linear  
 40 regression model developed for stations without the influence from WWTPs. The red points are  
 41 the observed N<sub>2</sub>O concentration.

42

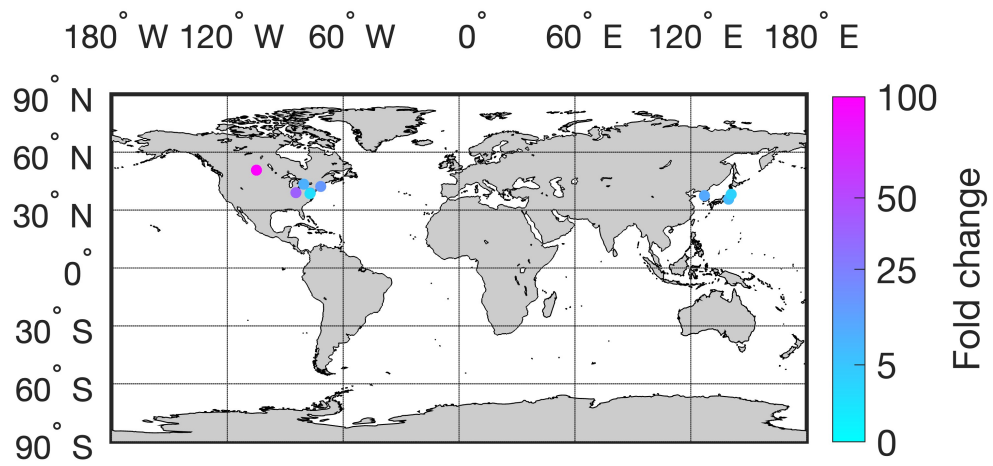

43

44 Supplementary Figure 6.  $N_2O$  observations associated with WWTPs globally, color-coded by the  
45 fold change in  $N_2O$  concentration, saturation or flux comparing downstream and upstream of  
46 WWTPs (see Table 1 for details).

47
